# Supplementary material for: Effect of surface morphology on methane interaction with calcite: a DFT study
Source: Royal Society of Chemistry journal article supplement (doi:10.1039/d0ra02471f), 2020-01-01
Supplement: d0ra02471f1.pdf [file d0ra02471f1.pdf]

# Effect of surface morphology on the CH<sub>4</sub> interaction with CaCO<sub>3</sub>: A DFT study

## Supporting Information

**Table S1.** Parameters used in deriving the surface energies.

| Surface             | $E_{slab}$ (eV) | $N_{slab}$ | A (Å)  | B (Å)  | Area (Å <sup>2</sup> ) | E surf (eV) | Surface Energy( $\gamma$ ) J/m <sup>2</sup> |
|---------------------|-----------------|------------|--------|--------|------------------------|-------------|---------------------------------------------|
| 104                 | -892.672        | 24         | 16.192 | 9.980  | 161.592                | 0.036       | 0.57                                        |
| 105                 | -1540.759       | 41.5       | 27.644 | 9.980  | 275.885                | 0.041       | 0.66                                        |
| 103                 | -1182.880       | 32         | 21.572 | 9.980  | 215.289                | 0.053       | 0.85                                        |
| 001_CO <sub>3</sub> | -854.408        | 23         | 9.980  | 9.980  | 99.600                 | 0.061       | 0.97                                        |
| 110                 | -587.006        | 16         | 8.096  | 12.750 | 103.223                | 0.076       | 1.23                                        |
| 100                 | -1477.822       | 40         | 9.980  | 17.060 | 170.259                | 0.086       | 1.37                                        |
| 101_Ca              | -879.664        | 24         | 12.750 | 9.980  | 127.247                | 0.096       | 1.54                                        |
| 101_CO <sub>3</sub> | -850.098        | 24         | 9.980  | 17.060 | 170.259                | 0.104       | 1.66                                        |
| 001_Ca              | -881.359        | 24         | 9.980  | 9.980  | 99.600                 | 0.115       | 1.84                                        |

$$\gamma = \frac{(E_{slab} - N_{slab}E_{bulk})}{2A_{slab}} \quad (1)$$

Energy of the calcite bulk = -226.049 eV

**Table S2.** The various adsorption positions and energies of the calcite surfaces studied (the highlighted rows have the highest adsorption energy for that surface)

$$E_{ads} = E_{surface + CH_4} - E_{surface} - E_{CH_4} \quad (2)$$

| 104               | Position           | $E_{surface}$ | $E_{CH_4}$ | $E_{surface + CH_4}$ | $E_{ads}$ (eV) |
|-------------------|--------------------|---------------|------------|----------------------|----------------|
|                   | Atop_Ca (3 layers) | -892.672      | -24.265    | -917.022             | -0.085         |
| Atop_O (3 layers) | -892.672           | -24.265       | -916.957   | -0.019               |                |

|                    |                        |                   |                |                  |               |
|--------------------|------------------------|-------------------|----------------|------------------|---------------|
|                    | Atop_C (3 layers)      | -892.672          | -24.265        | -916.893         | -0.050        |
|                    | Atop_Ca (4 layers)     | -1192.029         | -24.265        | -1216.384        | -0.089        |
|                    |                        |                   |                |                  |               |
| 001CO <sub>3</sub> | <b>Atop_C</b>          | <b>-854.4078</b>  | <b>-24.265</b> | <b>-878.776</b>  | <b>-0.103</b> |
|                    | Atop_Ca                | -854.4078         | -24.265        | -878.773         | -0.100        |
|                    | Atop_O                 | -854.4078         | -24.265        | -878.767         | -0.094        |
|                    |                        |                   |                |                  |               |
| 001Ca              | <b>Atop_Ca</b>         | <b>-881.35943</b> | <b>-24.265</b> | <b>-905.940</b>  | <b>-0.316</b> |
|                    | Atop_C                 | -881.35943        | -24.265        | -905.937         | -0.312        |
|                    | Atop_O                 | -881.35943        | -24.265        | -905.927         | -0.303        |
|                    |                        |                   |                |                  |               |
| 100                | <b>Atop_Ca</b>         | <b>-1477.822</b>  | <b>-24.265</b> | <b>-1502.630</b> | <b>-0.543</b> |
|                    | Atop_O_top             | -1477.822         | -24.265        | -1502.411        | -0.324        |
|                    | Atop_C                 | -1477.822         | -24.265        | -1502.406        | -0.319        |
|                    | Atop_O_below           | -1477.822         | -24.265        | -1502.371        | -0.284        |
|                    |                        |                   |                |                  |               |
| 101Ca              | <b>Atop_Ca</b>         | <b>-879.664</b>   | <b>-24.265</b> | <b>-904.335</b>  | <b>-0.406</b> |
|                    | Atop_O_below           | -879.664          | -24.265        | -904.300         | -0.371        |
|                    | Atop_C                 | -879.664          | -24.265        | -904.269         | -0.340        |
|                    | Atop_O_top             | -879.664          | -24.265        | -904.257         | -0.328        |
|                    |                        |                   |                |                  |               |
| 101CO <sub>3</sub> | <b>Atop_O</b>          | <b>-850.0984</b>  | <b>-24.265</b> | <b>-874.424</b>  | <b>-0.061</b> |
|                    | Atop_Ca                | -850.0984         | -24.265        | -874.423         | -0.059        |
|                    | Atop_C                 | -850.0984         | -24.265        | -874.421         | -0.058        |
|                    |                        |                   |                |                  |               |
| 103                | <b>Atop_C_lower(O)</b> | <b>-1182.880</b>  | <b>-24.265</b> | <b>-1207.452</b> | <b>-0.307</b> |
|                    | Atop_O_lower           | -1182.880         | -24.265        | -1207.445        | -0.301        |
|                    | Atop_Ca_upper          | -1182.880         | -24.265        | -1207.390        | -0.245        |
|                    | Atop_O_upper           | -1182.880         | -24.265        | -1207.341        | -0.196        |
|                    | Atop_C_Upper           | -1182.880         | -24.265        | -1207.282        | -0.137        |
|                    | Atop_Ca_Lower          | -1182.880         | -24.265        | -1207.246        | -0.101        |
|                    |                        |                   |                |                  |               |
| 105                | <b>Atop_Ca_upper</b>   | <b>-1540.759</b>  | <b>-24.265</b> | <b>-1565.215</b> | <b>-0.191</b> |
|                    | Atop_C_Upper           | -1540.759         | -24.265        | -1565.126        | -0.102        |
|                    | Atop_O_upper           | -1540.759         | -24.265        | -1565.110        | -0.086        |
|                    | Atop_C_lower           | -1540.759         | -24.265        | -1565.079        | -0.055        |
|                    | Atop_O_lower           | -1540.759         | -24.265        | -1565.076        | -0.051        |
|                    | Atop_Ca_Lower          | -1540.759         | -24.265        | -1565.071        | -0.046        |
|                    |                        |                   |                |                  |               |
| 110                | <b>Atop_O1</b>         | <b>-587.006</b>   | <b>-24.265</b> | <b>-613.18</b>   | <b>-1.910</b> |
|                    | Atop_Ca                | -587.006          | -24.265        | -612.31          | -1.036        |
|                    | Atop_O3                | -587.006          | -24.265        | -611.94          | -0.666        |
|                    | Atop_O2_top            | -587.006          | -24.265        | -611.47          | -0.198        |

|  |                    |          |         |          |        |
|--|--------------------|----------|---------|----------|--------|
|  | Atop_O1 (5 layers) | -739.269 | -24.265 | -765.453 | -1.919 |
|--|--------------------|----------|---------|----------|--------|

**Table S3.** The parameters used in deriving the adsorption capacity for the 110 surface

$$E_{ads.cap} = \frac{E_{ads}}{nA_{slab}} \quad (3)$$

| <b>N</b> | <b>N* E<sub>methane</sub> (eV)</b> | <b>E<sub>surface+methane</sub> (eV)</b> | <b>Ads.capacity (eV)</b> | <b>Ads. capacity/Area (eV/Å<sup>2</sup>)</b> |
|----------|------------------------------------|-----------------------------------------|--------------------------|----------------------------------------------|
| 1        | -24.265                            | -613.180                                | -1.910                   | -0.018                                       |
| 2        | -48.530                            | -637.589                                | -1.027                   | -0.010                                       |
| 3        | -72.795                            | -662.003                                | -0.734                   | -0.007                                       |
| 4        | -97.060                            | -686.366                                | -0.575                   | -0.006                                       |
| 5        | -121.325                           | -710.806                                | -0.495                   | -0.005                                       |
| 6        | -145.591                           | -735.255                                | -0.443                   | -0.004                                       |
| 7        | -169.856                           | -759.655                                | -0.399                   | -0.004                                       |
| 8        | -194.121                           | -784.004                                | -0.360                   | -0.003                                       |
| 9        | -218.386                           | -808.394                                | -0.334                   | -0.003                                       |
| 10       | -242.651                           | -832.855                                | -0.320                   | -0.003                                       |
| 11       | -266.916                           | -857.456                                | -0.321                   | -0.003                                       |
| 12       | -291.181                           | -881.803                                | -0.301                   | -0.003                                       |
| 13       | -315.446                           | -906.255                                | -0.293                   | -0.003                                       |
| 14       | -339.711                           | -930.703                                | -0.285                   | -0.003                                       |
| 15       | -363.976                           | -955.248                                | -0.284                   | -0.003                                       |
| 16       | -388.241                           | -978.819                                | -0.223                   | -0.002                                       |
| 17       | -412.506                           | -1003.175                               | -0.215                   | -0.002                                       |
| 18       | -436.772                           | -1027.544                               | -0.209                   | -0.002                                       |
| 19       | -461.037                           | -1051.870                               | -0.201                   | -0.002                                       |
| 20       | -485.302                           | -1076.198                               | -0.195                   | -0.002                                       |
| 21       | -509.567                           | -1100.542                               | -0.189                   | -0.002                                       |
| 22       | -533.832                           | -1124.885                               | -0.184                   | -0.002                                       |
| 23       | -558.097                           | -1149.259                               | -0.181                   | -0.002                                       |
| 24       | -582.362                           | -1149.265                               | 0.838                    | 0.008                                        |

The E<sub>slab</sub> and Area for the 110 surface can be found in Table S1.

**Table S4.** The parameters used in deriving the adsorption capacity for the 104surface

| <b>N</b> | <b>N* E<sub>methane</sub> (eV)</b> | <b>E<sub>surface+methane</sub> (eV)</b> | <b>Ads.capacity (eV)</b> | <b>Ads. capacity/Area (eV/Å<sup>2</sup>)</b> |
|----------|------------------------------------|-----------------------------------------|--------------------------|----------------------------------------------|
| 1        | -24.265                            | -917.022                                | -0.085                   | -0.0005                                      |
| 2        | -48.530                            | -941.443                                | -0.120                   | -0.0007                                      |
| 3        | -72.795                            | -965.849                                | -0.127                   | -0.0008                                      |
| 4        | -97.060                            | -989.664                                | 0.017                    | 0.0001                                       |

The E<sub>slab</sub> and Area for the 104 surface can be found in Table S1
